# Supplementary material for: Mutations That Alter the Bacterial Cell Envelope Increase Lipid Production
Source: PubMed Central journal article supplement (PMC5442454; doi:10.1128/mbio.00513-17), 2017-05-23

**A**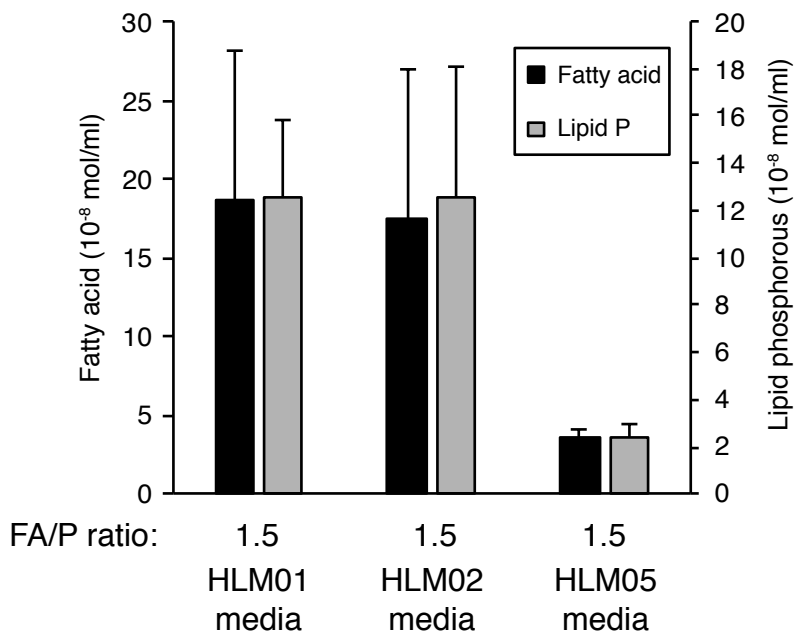**B**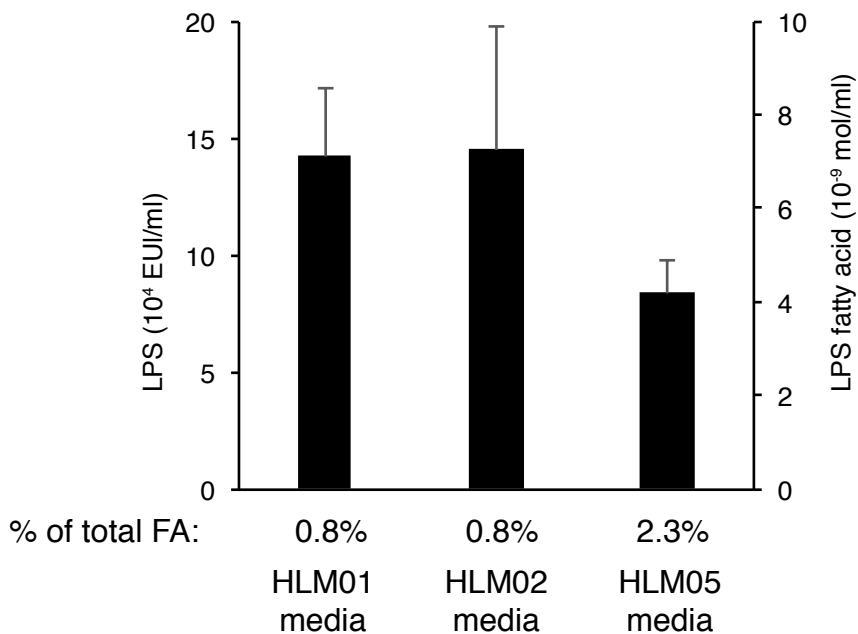

Supplement: mbo003173316sf5.pdf [file mbo003173316sf5.pdf]
