# Supplementary material for: Mutations That Alter the Bacterial Cell Envelope Increase Lipid Production
Source: PubMed Central journal article supplement (PMC5442454; doi:10.1128/mbio.00513-17), 2017-05-23
Supplement: mbo003173316st1.pdf [file mbo003173316st1.pdf]

Table S1. Strains and plasmids used in this study

| Strain                                     | Relevant properties                                                                                                                                      | Source or Reference            |
|--------------------------------------------|----------------------------------------------------------------------------------------------------------------------------------------------------------|--------------------------------|
| <i>E. coli</i>                             |                                                                                                                                                          |                                |
| DH5 $\alpha$                               | Host for cloning and plasmid amplification                                                                                                               | Bethesda Research Laboratories |
| DH5 $\alpha$ / $\lambda$ pir               | Host for cloning Tn5 insertion sites; $\Phi$ 80dlacZ $\Delta$ M15 $\Delta$ (lacZYA-argF) U169 recA1 hsdR17 deoR thi-1 supE44 gyrA96 relA1/ $\lambda$ pir | (70)                           |
| S17-1                                      | Donor for conjugation; C600::RP-4 2-(Tc::Mu) (Kn::Tn7) thi pro hsdR recA Tra <sup>+</sup>                                                                | (71)                           |
| BW20767                                    | Donor for conjugation; RP-2-Tc::Mu-1 kan::Tn7 integrant leu-63::IS10 recA1 zbf-5 creB510 hsdR17 endA1 thi uidA ( $\Delta$ MluI)::pir+                    | (72)                           |
| <i>R. sphaeroides</i>                      |                                                                                                                                                          |                                |
| 2.4.1                                      | Wild-type strain                                                                                                                                         | (73)                           |
| $\Delta$ 0382 (parent strain)              | $\Delta$ RSP0382 in 2.4.1                                                                                                                                | (20)                           |
| HLM01                                      | $\Delta$ 0382 with Tn5 insertion at Chr1: 1,471,645; Km <sup>R</sup>                                                                                     | This study                     |
| HLM02                                      | $\Delta$ 0382 with Tn5 insertion at Chr1: 1,469,665; Km <sup>R</sup>                                                                                     | This study                     |
| HLM03                                      | $\Delta$ 0382 with Tn5 insertion at Chr2: 274,987; Km <sup>R</sup>                                                                                       | This study                     |
| HLM04                                      | $\Delta$ 0382 with Tn5 insertion at Chr1: 2,814,885; Km <sup>R</sup>                                                                                     | This study                     |
| HLM05                                      | $\Delta$ 0382 with Tn5 insertion at Chr1: 2,970,757; Km <sup>R</sup>                                                                                     | This study                     |
| HLM06                                      | $\Delta$ 0382 with Tn5 insertion at Chr2: 938,456; Km <sup>R</sup>                                                                                       | This study                     |
| HLM07                                      | $\Delta$ 0382 with Tn5 insertion at Chr1: 2,086,261; Km <sup>R</sup>                                                                                     | This study                     |
| HLM08                                      | $\Delta$ 0382 with Tn5 insertion at Chr1: 1,189,239; Km <sup>R</sup>                                                                                     | This study                     |
| HLM08b                                     | Same as HLM08, isolated independently from screen                                                                                                        | This study                     |
| HLM09                                      | $\Delta$ 0382 with Tn5 insertion at Chr1: 1,395,725; Km <sup>R</sup>                                                                                     | This study                     |
| HLM10                                      | $\Delta$ 0382 with Tn5 insertion at Chr1: 916,649; Km <sup>R</sup>                                                                                       | This study                     |
| KL116                                      | HLM02 carrying plasmid pKCL22 to express Myc-tagged NtrX; Km <sup>R</sup> , Sp <sup>R</sup>                                                              | This study                     |
| $\Delta$ NrtYX $\Delta$ 0382               | $\Delta$ RSP2839, $\Delta$ RSP2840, $\Delta$ RSP0382 in 2.4.1                                                                                            | This study                     |
| $\Delta$ ChrR $\Delta$ NrtYX $\Delta$ 0382 | $\Delta$ chrR-1::dfr, $\Delta$ RSP2839, $\Delta$ RSP2840, $\Delta$ RSP0382 in 2.4.1.                                                                     | This study                     |
| <b>Plasmids</b>                            |                                                                                                                                                          |                                |
| pRL27                                      | Tn5-RL27 delivery vector (Km <sup>R</sup> -oriR6 K)                                                                                                      | (61)                           |
| pK18mobsacb                                | Broad host range mobilizable vector; Km <sup>R</sup> oriV oriT mob sacB                                                                                  | (68)                           |
| pKCL20                                     | 5,939-bp <i>R. sphaeroides</i> genomic region containing RSP2839 and RSP2840 cloned into the XbaI and HindIII sites of pK18mobsacB; Km <sup>R</sup>      | This study                     |
| pKCL21                                     | pKCL20 with RSP2839 and RSP2840 deleted; Km <sup>R</sup>                                                                                                 | This study                     |
| pJDN27                                     | pSUP202-derived suicide plasmid that creates an insertion of Tp <sup>R</sup> gene into a deletion of chrR gene                                           | (69)                           |
| pIND5-myc                                  | Expression vector with IPTG-inducible promoter, includes 3X myc tag; Sp <sup>R</sup>                                                                     | (74)                           |
| pKCL22                                     | N-terminally 3X myc tagged ntrX (RSP 2840) cloned into BamHI and HindIII sites of pIND5-myc; Sp <sup>R</sup>                                             | This study                     |
