# Supplementary material for: Mutations That Alter the Bacterial Cell Envelope Increase Lipid Production
Source: PubMed Central journal article supplement (PMC5442454; doi:10.1128/mbio.00513-17), 2017-05-23
Supplement: mbo003173316st3.pdf [file mbo003173316st3.pdf]

Table S3. Relative fatty acid content of *R. sphaeroides*  $\Delta$ ChrR $\Delta$ NtrYXpd.

| <b>Strain</b> | <b>C16:1</b> | <b>C16:0</b> | <b>C18:1</b> | <b>C18:0</b> | <b>19M-UFA</b> | <b>19Fu-FA</b> |
|---------------|--------------|--------------|--------------|--------------|----------------|----------------|
| <b>Cells</b>  | 3.2 (0.8)    | 11.3 (0.8)   | 69.2 (2.2)   | 12.5 (0.7)   | 0.8 (0.6)      | 2.9 (0.5)      |
| <b>Media</b>  | 0.9 (0.8)    | 13.2 (2.1)   | 64.5 (6.6)   | 15.9 (3.0)   | 1.3 (0.3)      | 4.2 (1.8)      |

Percentage composition of the individual fatty acid species. 11-methyl-octadecanoate (19M-UFA), 10,13-epoxy-11-methyl-octadecadienoic acid (19Fu-FA). Standard deviation in parentheses. N=7.
